# Supplementary material for: High-Depth Viral Blood Metagenomics Reveals Extensive Anellovirus Diversity in Healthy Humans
Source: Research Square preprint supplement (doi:10.21203/rs.3.rs-115092/v1), 2020-12-04
Supplement: Supplementary file 1 [file 1cbfe42362acd24d0d10b503.xlsx]

## Sheet: Hoja1
			C00	C01	C02	P01		P02		P03		P04		P05		P06		P07		P08		P09		P10		P11		P12
			centrifuge	centrifuge	centrifuge	centrifuge	recentrifuge	centrifuge	recentrifuge	centrifuge	recentrifuge	centrifuge	recentrifuge	centrifuge	recentrifuge	centrifuge	recentrifuge	centrifuge	recentrifuge	centrifuge	recentrifuge	centrifuge	recentrifuge	centrifuge	recentrifuge	centrifuge	recentrifuge	centrifuge	recentrifuge
		01- # total reads	1923407	1219848	1978511	835504	183836	1948103	123617	1008317	123390	1909824	131804	2420824	77249	2706682	47957	1771038	336968	1712606	195036	2042540	509882	1541190	155952	2390182	76143	1935479	73048
		02- # bacterial reads	114766	92141	236121	10521	3517	71069	16815	53955	5446	97127	7838	160281	35525	115824	23741	91951	8157	95479	8758	118152	8927	102393	16412	176473	16053	92920	9804
Environmental samples			29031	27074	6575	0	0	14462	0	13442	133	30312	157	20692	1157	22193	489	21402	351	17561	21	27535	288	23333	285	49836	675	21600	214
Unclassified bacteria			369	273	154	0	0	157	18	398	22	211	24	1056	139	911	111	494	74	3023	349	519	45	389	39	1426	40	330	19
Proteobacteria			19750	19084	127970	4061	2063	16628	5228	9372	1482	18716	4200	53691	3628	27118	2015	16713	2743	18737	2604	18957	3054	31414	13442	33656	4480	22908	4992
		Environmental samples	20	32	0	0	0	22	0	14	0	31	0	60	0	209	206	9	0	16	0	40	0	6	0	456	0	13	0
		Unclassified_Proteobacteria	0	0	0	0	0	0	0	0	0	0	0	0	0	0	0	0	0	0	0	15	14	0	0	0	0	0	0
	Alphaproteobacteria		6573	5201	6523	1110	777	2787	316	1558	326	3414	678	39081	512	3655	410	4131	957	5028	444	4662	1020	2869	405	7394	1836	3313	365
		Caulobacterales	187	95	35	0	0	220	0	42	12	70	18	72	38	123	30	97	19	241	0	144	25	203	0	192	71	124	59
		Environmental samples	55	140	32	0	0	80	6	124	51	119	22	39	0	109	22	265	0	21	0	124	12	133	92	327	23	34	9
		Holosporales	436	165	26	256	0	55	0	80	0	288	16	87	0	154	0	141	0	80	0	69	0	62	0	243	26	84	0
		Magnetococcales	0	0	0	0	0	0	0	0	0	0	0	9	9	0	0	0	0	0	0	7	7	0	0	0	0	0	0
		Parvularculares	0	0	0	0	0	0	0	0	0	0	0	0	0	0	0	0	0	0	0	0	0	0	0	8	8	0	0
		Pelagibacterales	12	0	45	131	129	18	0	7	0	134	123	74	59	19	10	66	64	8	0	46	0	12	0	117	114	18	0
		Rhizobiales	802	924	4338	627	613	418	121	212	73	708	205	625	115	420	83	846	366	1760	234	964	456	305	42	1071	463	868	166
		Rickettsiales	275	2193	175	42	0	885	87	364	35	304	100	30557	35	427	131	379	19	936	87	178	43	123	16	779	136	117	32
		Rhodobacterales	1179	414	370	45	35	473	19	273	136	739	44	622	91	571	50	814	157	504	66	1375	72	991	55	1999	383	550	9
		Rhodospirillales	245	49	1054	0	0	131	57	166	0	229	84	117	10	189	44	128	54	156	24	278	148	159	99	646	458	206	50
		Sphingomonadales	3048	1085	308	8	0	402	26	205	13	588	66	6686	155	1383	27	1107	268	901	7	1170	189	661	91	1134	77	1147	34
		Unclassified Alphaproteobacteria	17	17	0	0	0	10	0	9	6	8	0	26	0	22	13	61	10	32	26	31	28	15	10	251	77	10	6
	Betaproteobacteria		7514	4002	15451	115	62	3996	59	4170	93	6266	743	5289	263	6149	440	4232	382	4881	331	5597	199	5391	366	13860	946	4566	144
		Burkholderiales	4909	3431	14698	101	62	2869	36	2257	63	4517	266	2709	197	4329	402	3200	181	2754	187	4089	105	3924	275	11264	775	3837	83
		Environmental samples	222	158	0	0	0	156	0	148	0	162	0	57	0	120	0	57	0	117	0	58	0	99	0	278	31	98	0
		Neisseriales	164	41	189	0	0	73	0	1158	30	117	20	1595	7	325	0	238	16	259	83	101	16	512	53	236	6	153	0
		Nitrosomonadales	214	98	201	0	0	191	6	104	0	328	35	92	30	257	28	189	26	1113	19	724	71	262	7	373	16	75	19
		Procabacteriales	0	0	0	0	0	0	0	0	0	0	0	0	0	0	0	0	0	0	0	0	0	0	0	0	0	6	6
		Rhodocyclales	447	34	106	0	0	45	0	13	0	100	80	357	29	29	10	25	0	58	42	34	0	47	12	157	102	37	9
		Unclassified Betaproteobacteria	223	69	60	6	0	72	17	25	0	439	342	132	0	101	0	241	151	70	0	114	7	125	19	349	16	141	27
	Gammaproteobacteria		4665	8677	101483	2749	1179	8715	4500	2478	348	6370	925	5249	613	10054	539	4882	990	7844	1627	6256	913	21273	12407	9599	1251	9098	3066
		Acidiferrobacterales	0	0	0	0	0	8	8	0	0	0	0	0	0	33	33	9	9	0	0	13	13	0	0	0	0	9	9
		Aeromonadales	46	17	1790	0	0	52	33	0	0	25	8	59	0	0	0	56	16	848	808	64	0	31	0	56	11	312	290
		Alteromonadales	532	151	86841	280	270	124	0	120	43	342	159	203	52	916	33	458	314	225	41	290	154	103	30	323	9	145	6
		Chromatiales	243	53	538	0	0	47	11	60	0	102	6	136	27	273	84	332	8	149	36	141	70	145	0	206	0	1986	1894
		Cellvibrionales	210	48	547	0	0	31	0	47	0	68	15	43	6	289	26	121	0	119	6	105	0	50	0	238	63	143	0
		Cardiobacteriales	0	14	0	0	0	50	20	9	7	0	0	0	0	0	0	0	0	10	8	0	0	0	0	6	0	0	0
		Enterobacterales	1066	2041	2593	440	55	5195	2705	541	47	2433	478	1665	155	1612	81	1425	183	1364	246	2376	167	4275	141	3561	274	2964	140
		Environmental samples	93	42	0	0	0	114	0	35	0	79	0	243	9	30	8	30	9	28	8	789	0	131	0	225	114	78	7
		Inmunodisolibacterales	0	0	0	0	0	0	0	0	0	0	0	0	0	0	0	0	0	0	0	0	0	0	0	31	31	0	0
		Legionellales	552	86	446	293	0	169	32	100	14	326	44	65	25	160	52	120	8	110	70	106	0	84	8	521	79	226	119
		Methylococcales	29	8	81	0	0	111	109	7	0	8	0	32	0	20	6	84	62	23	9	75	0	43	0	44	7	232	61
		Nevskiales	15	8	0	0	0	235	171	0	0	49	36	10	0	39	32	0	0	0	0	0	0	6	0	15	0	13	0
		Pasteurellales	29	63	251	9	0	98	83	62	25	74	0	495	110	23	0	220	179	2272	221	296	128	34	18	230	8	460	61
		Pseudomonadales	711	5359	3079	1453	693	725	381	1053	79	2133	87	1212	86	1887	63	1255	64	2218	30	1053	198	5147	1770	2296	457	1678	343
		Oceanospirillales	215	172	396	6	0	147	6	186	133	165	28	185	37	134	34	264	25	212	52	248	77	178	53	512	38	148	37
		Orbales	0	0	26	0	0	0	0	0	0	0	0	119	0	8	0	0	0	368	0	0	0	0	0	6	0	0	0
		Thiotrichales	86	25	191	9	0	168	6	12	0	79	51	62	21	37	18	0	0	80	0	81	33	10483	10381	65	20	62	37
		Salinisphaerales	0	0	11	0	0	0	0	0	0	0	0	0	0	0	0	0	0	0	0	0	0	0	0	0	0	0	0
		Unclassified_Gammaproteobacteria	29	30	31	156	153	262	238	17	0	21	7	70	58	81	54	40	26	21	9	95	35	16	0	25	6	15	0
		Vibrionales	312	180	1130	95	8	55	15	39	0	78	0	74	7	3577	0	115	61	122	25	77	0	57	0	613	52	215	54
		Xantomonadales	190	238	3371	0	0	837	644	65	0	168	6	331	20	170	15	137	12	1490	13	225	38	172	6	280	82	127	8
	Deltaproteobacteria		493	500	429	44	36	447	306	245	149	2102	1739	2851	2167	353	175	829	359	299	43	1111	639	592	190	982	303	469	160
		Bradymonadales	0	12	0	0	0	0	0	10	0	52	0	0	0	0	0	0	0	0	0	29	0	81	0	0	0	0	0
		Candidatus_Desulfofervidaceae	0	35	0	0	0	0	0	0	0	0	0	0	0	0	0	7	0	0	0	0	0	0	0	0	0	19	0
		Desulfobacterales	33	9	20	0	0	175	168	19	9	7	0	136	21	94	73	17	6	18	0	276	234	61	0	136	24	39	27
		Desulfovibrionales	70	219	66	0	0	50	9	23	0	41	9	36	0	68	47	240	206	30	7	77	44	93	32	101	60	144	12
		Desulfurellales	14	0	0	0	0	7	0	0	0	7	0	0	0	0	0	10	7	0	0	11	0	21	21	0	0	0	0
		Desulfuromonadales	50	22	39	30	30	28	23	15	0	167	73	15	0	18	0	29	6	7	0	318	281	34	19	48	16	13	0
		Environmental samples	105	25	0	0	0	15	0	12	0	26	10	2152	2140	16	0	15	0	18	0	24	0	22	0	146	34	48	29
		Myxococcales	203	158	254	0	0	86	27	131	112	1679	1563	163	0	139	55	368	83	178	19	328	55	238	99	275	162	148	45
		Syntrophobacterales	9	0	0	6	6	79	79	28	28	87	84	8	6	6	0	115	51	18	17	26	25	20	19	13	7	48	47
	Epsilonproteobacteria		206	391	2884	42	9	404	47	638	530	195	98	182	58	272	157	2341	55	425	137	802	269	953	52	378	120	2465	1257
		Campylobacterales	154	380	2823	42	9	339	47	637	530	147	59	154	36	213	105	2329	55	416	137	775	260	907	42	315	107	2172	992
		Environmental samples	0	0	0	0	0	0	0	0	0	0	0	0	0	0	0	0	0	0	0	0	0	10	10	13	13	0	0
		Nautiliales	51	7	53	0	0	62	0	0	0	31	30	23	22	0	0	8	0	0	0	17	0	18	0	24	0	286	265
		Unclassified_Epsilonproteobacteria	0	0	7	0	0	0	0	0	0	12	9	0	0	52	52	0	0	0	0	9	9	0	0	25	0	0	0
	Zetaproteobacteria		6	0	0	0	0	0	0	0	0	0	0	0	0	6	0	0	0	0	0	6	0	6	0	0	0	7	0
		Mariprofundales	6	0	0	0	0	0	0	0	0	0	0	0	0	6	0	0	0	0	0	6	0	6	0	0	0	7	0
	Oligoflexia		50	76	164	0	0	56	0	66	36	79	17	268	15	5764	88	58	0	75	22	99	0	83	22	237	7	107	0
		Bdellovibrionales	40	64	61	0	0	32	0	14	0	33	0	229	0	5667	0	38	0	40	0	88	0	41	0	73	0	68	0
		Bacteriovoracles	8	7	59	0	0	16	0	47	36	26	17	25	15	93	88	15	0	28	22	6	0	32	22	92	7	6	0
		Silvanigrellales	0	0	44	0	0	16	0	0	0	20	0	14	0	0	0	0	0	7	0	0	0	10	0	72	0	32	0
	Acidithiobacillia		7	0	0	0	0	0	0	0	0	38	0	9	0	0	0	0	0	0	0	9	0	0	0	20	17	0	0
		Acidithiobacillales	7	0	0	0	0	0	0	0	0	38	0	9	0	0	0	0	0	0	0	9	0	0	0	20	17	0	0
	Hydrogenophilalia		0	0	100	0	0	0	0	0	0	0	0	0	0	0	0	0	0	0	0	0	0	0	0	27	0	0	0
		Hydrogenophilales	0	0	100	0	0	0	0	0	0	0	0	0	0	0	0	0	0	0	0	0	0	0	0	27	0	0	0
Terrabacteria group			20434	16293	79978	4029	1336	15000	9792	9641	3179	13555	1819	38662	29714	11256	1874	13455	3882	14624	4480	16996	3487	14825	1571	24066	7945	15019	3620
		unclassified_Terrabacteria	0	0	0	0	0	0	0	0	0	0	0	0	0	0	0	0	0	0	0	8	8	0	0	0	0	0	0
Actinobacteria			6912	2787	15947	295	140	1350	90	1482	140	2918	182	3306	526	2637	172	2897	478	3472	760	5793	812	3325	319	5493	885	3661	615
		Unclassified_Actinobacteria	0	0	0	0	0	0	0	10	0	9	0	0	0	7	0	15	0	34	12	119	0	134	6	86	0	57	55
	Actinobacteria		5439	2787	15919	293	140	1235	90	1115	140	2663	182	3071	526	2158	111	2897	478	2900	395	5241	745	2772	276	4456	829	3201	495
		Acidothermales	0	0	0	0	0	0	0	0	0	0	0	0	0	0	0	0	0	0	0	18	18	0	0	0	0	0	0
		Actinomycetales	139	37	11	0	0	24	0	31	7	63	7	31	0	125	7	40	0	96	22	130	19	59	12	89	11	52	14
		Actinopolysporales	0	0	0	41	41	0	0	0	0	0	0	0	0	0	0	0	0	0	0	0	0	0	0	0	0	0	0
		Bifidobacteriales	35	234	15	0	0	35	0	57	13	47	9	28	0	24	0	34	0	48	0	71	0	41	0	122	9	54	6
		Catenulisporales	0	0	0	0	0	0	0	0	0	0	0	0	0	0	0	9	9	0	0	65	65	0	0	34	34	0	0
		Candidatus_Actinomarinidae	0	11	0	0	0	0	0	0	0	0	0	14	0	0	0	0	0	0	0	6	0	0	0	12	0	0	0
		Candidatus_Nanopelagicales	207	27	59	0	0	12	0	44	21	31	0	11	0	25	0	15	0	24	9	230	162	297	77	212	141	6	0
		Corynebacteriales	1218	164	1999	6	0	165	22	131	0	587	67	357	61	237	32	367	240	161	21	329	7	303	38	411	130	446	332
		Environmental samples	66	143	0	0	0	19	0	90	0	103	0	94	0	91	0	101	0	81	0	91	0	57	0	95	0	33	0
		Frankiales	72	0	16	0	0	37	0	49	0	0	0	16	0	11	0	0	0	0	0	38	0	150	49	0	0	29	0
		Geodermatophilales	26	0	15	0	0	0	0	0	0	0	0	12	0	6	0	0	0	14	10	38	0	7	0	10	0	6	0
		Glycomycetales	46	0	0	0	0	0	0	0	0	0	0	0	0	0	0	0	0	0	0	0	0	0	0	0	0	0	0
		Kineosporiales	0	0	10	0	0	0	0	0	0	0	0	0	0	0	0	0	0	0	0	0	0	0	0	0	0	0	0
		Micrococcales	2133	1485	10229	151	99	509	10	473	87	920	92	1371	288	769	30	1017	89	1218	120	2547	393	1133	37	2261	367	1376	99
		Micromonosporales	14	23	437	0	0	16	13	0	0	23	0	21	0	20	0	11	0	97	25	61	0	8	0	33	11	10	0
		Nakamurellales	0	0	0	0	0	6	6	0	0	0	0	0	0	0	0	0	0	0	0	0	0	0	0	0	0	0	0
		Propionibacteriales	520	105	346	0	0	143	0	91	12	215	0	420	29	237	0	259	28	383	151	373	43	258	17	422	18	238	25
		Pseudonocardiales	35	81	524	0	0	8	0	7	0	16	7	26	0	39	12	118	91	23	0	33	0	29	6	56	18	19	0
		Streptomycetales	319	200	1012	71	0	202	15	45	0	477	0	282	50	453	30	282	21	294	6	394	31	212	31	396	34	807	9
		Streptosporangiales	17	6	116	0	0	17	10	10	0	0	0	91	85	11	0	0	0	0	0	42	0	13	0	18	0	13	0
		Unclassified_Actinobacteria	26	8	0	0	0	8	8	0	0	0	0	16	13	0	0	6	0	31	31	7	7	11	0	57	56	11	10
	Acidimicrobiia		74	51	9	0	0	0	0	182	0	20	0	24	0	23	0	38	0	112	102	35	0	89	0	80	23	31	18
		Acidimicrobiales	74	51	9	0	0	0	0	182	0	20	0	24	0	23	0	38	0	105	95	35	0	89	0	79	23	31	18
		Environmental samples	0	0	0	0	0	0	0	0	0	0	0	0	0	0	0	0	0	7	7	0	0	5	0	0	0	0	0
	Coriobacteriia		21	44	10	0	0	37	6	23	0	65	0	31	0	23	0	40	0	339	251	115	10	80	9	93	17	12	0
		Coriobacteriales	21	39	0	0	0	34	6	21	0	64	0	29	0	15	0	35	0	325	251	93	0	63	0	74	0	7	0
		Eggerthellales	0	0	7	0	0	0	0	0	0	0	0	0	0	8	0	0	0	11	0	20	10	16	9	19	17	0	0
	Thermoleophilia		21	6	0	0	0	0	0	0	0	0	0	0	0	0	0	0	0	0	0	14	0	15	0	10	0	0	0
		Solirubrobacterales	21	6	0	0	0	0	0	0	0	0	0	0	0	0	0	0	0	0	0	14	0	15	0	10	0	0	0
	Rubrobacteria		0	0	6	0	0	0	0	0	0	0	0	0	0	55	0	0	0	0	0	0	0	0	0	8	8	47	47
		Rubrobacterales	0	0	6	0	0	0	0	0	0	0	0	0	0	55	0	0	0	0	0	0	0	0	0	8	8	47	47
	Nitriliruptoria		0	0	0	0	0	0	0	0	0	0	0	0	0	0	0	0	0	0	0	57	57	28	28	8	8	0	0
		Egibacterales	0	0	0	0	0	0	0	0	0	0	0	0	0	0	0	0	0	0	0	0	0	28	28	0	0	0	0
		Egicoccales	0	0	0	0	0	0	0	0	0	0	0	0	0	0	0	0	0	0	0	55	55	0	0	0	0	0	0
		Euzebyales	0	0	0	0	0	0	0	0	0	0	0	0	0	0	0	0	0	0	0	0	0	0	0	6	6	0	0
Cyanobacteria/Melainabacteria group.			6027	3862	26459	821	347	1864	129	3054	898	3167	535	2983	420	5475	1114	4661	693	5231	2012	4265	216	5725	486	5436	554	5286	263
Cyanobacteria			6022	3838	26456	821	347	1838	129	3051	898	3159	535	2909	420	5471	1114	4643	693	5229	2012	4255	216	5723	486	5425	554	5260	263
		Chroococcidiopsidales	34	41	0	0	0	9	0	11	0	29	0	10	0	44	22	74	0	9	0	87	0	29	0	134	15	70	0
		Environmental samples	465	534	0	0	0	258	0	206	0	860	0	879	0	389	0	360	0	652	0	728	0	510	0	1088	0	1314	0
		Gloeomargaritales	8	0	0	0	0	0	0	6	0	7	0	0	0	0	0	0	0	0	0	0	0	0	0	10	0	9	0
		Nostocales	158	91	25283	178	0	202	7	929	872	192	92	213	46	394	10	863	596	391	213	147	51	213	28	270	69	1015	89
		Pleurocapsales	16	105	7	0	0	11	0	16	6	22	0	32	6	47	33	12	0	22	0	42	13	66	61	133	51	75	32
		Synechococcales	3518	1309	237	284	11	507	21	1428	14	1083	33	718	0	1567	56	1705	38	1644	104	1581	90	3757	164	2241	260	864	71
		Unclassified Cyanobacteria	16	24	0	0	0	12	12	0	0	29	25	6	0	11	6	6	0	0	0	0	0	0	0	41	38	0	0
subclass	Oscillatoriophycideae		842	998	380	357	336	711	89	353	6	764	385	777	368	2086	987	1479	51	2196	1695	1254	62	861	233	1008	121	1124	71
		Chroococcales	501	294	253	346	336	129	52	62	6	515	292	263	75	1219	987	65	13	270	0	578	56	243	114	274	0	467	59
		Oscillatoriales	341	704	127	11	0	582	37	291	0	249	93	514	293	867	0	1414	38	1926	1695	676	6	618	119	734	121	657	12
	Gloeobacteria		10	0	0	0	0	0	0	0	0	0	0	0	0	6	0	9	8	9	0	7	0	7	0	0	0	9	0
		Gloeobacterales	9	0	0	0	0	0	0	0	0	0	0	0	0	6	0	8	8	9	0	7	0	0	0	0	0	9	0
candidatus_Melainabacteria			0	24	0	0	0	26	0	0	0	8	0	74	0	0	0	18	0	0	0	10	0	0	0	11	0	26	0
Firmicutes			5976	8099	36309	2756	761	10872	9079	4485	2064	6274	974	31291	28690	2818	455	4592	2059	5402	1566	5523	1872	4470	496	10712	5247	4892	2567
		Environmental samples	12	7	0	0	0	0	0	0	0	32	0	10	0	0	0	7	0	0	0	32	0	0	0	411	396	0	0
		Unclassified_Firmicutes sensu stricto	0	0	0	0	0	24	23	0	0	7	7	0	0	6	0	0	0	0	0	0	0	0	0	25	25	0	0
	Bacilli		2212	4721	34168	1230	442	5637	4814	3431	1825	3737	660	30129	28567	1997	365	2347	842	4147	1123	3494	775	1406	342	5177	2842	3253	1901
		Bacillales	708	3658	31992	767	423	5199	4736	2254	1817	3064	487	5508	4465	1245	197	1809	737	3605	981	2682	664	912	191	3777	2521	2779	1805
		Lactobacillaes	1456	1055	2173	463	19	424	78	1170	8	610	173	24481	24102	705	168	528	105	496	142	773	111	480	151	1347	321	441	96
	Clostridia		1353	3098	1783	1516	319	4918	4188	942	191	2351	253	975	60	524	61	1184	386	949	221	1542	783	2723	124	4468	1680	1140	280
		Clostridiales	1289	2975	1540	1129	75	4726	4178	880	149	2316	253	651	35	451	54	1135	386	856	152	1403	783	2651	102	4124	1658	1039	270
		Halanaerobiales	9	23	80	0	0	35	0	0	0	0	0	19	0	0	0	14	0	73	69	9	0	27	0	9	0	30	0
		Natranaerobiales	8	0	0	0	0	0	0	0	0	0	0	0	0	0	0	0	0	0	0	6	0	0	0	51	0	0	0
		Thermoanaerobacterales	40	94	161	387	244	99	10	56	42	31	0	297	25	64	7	32	0	11	0	113	94	41	22	66	22	66	10
	Erysipelotrichia		23	9	12	0	0	16	13	14	0	12	0	21	14	23	0	198	192	6	0	69	64	16	0	192	180	21	0
		Erysipelotrichales	23	9	12	0	0	16	13	14	0	12	0	21	14	23	0	198	192	6	0	69	64	16	0	192	180	21	0
	Negativicutes		2228	13	22	0	0	34	22	23	8	57	41	65	14	54	13	713	629	221	207	77	58	41	30	101	83	123	82
		Acidaminococcales	0	0	0	0	0	0	0	8	0	0	0	0	0	0	0	71	71	207	207	0	0	0	0	0	0	0	0
		Selenomondales	2204	0	19	0	0	30	22	14	9	27	23	15	14	38	7	460	454	0	0	32	26	33	30	74	72	102	64
		Veillonellales	17	10	0	0	0	0	0	0	0	28	18	45	0	14	6	181	104	9	0	41	32	7	0	19	11	20	18
	Tissierellia		32	141	301	0	0	45	19	56	31	22	13	48	35	72	16	32	10	26	15	247	192	21	0	146	41	311	304
		Tissierellales	32	141	301	0	0	45	19	55	31	21	13	45	35	66	10	32	10	26	15	247	192	21	0	146	41	311	304
		Unclassified_Tissierellia	0	0	0	0	0	0	0	0	0	0	0	0	0	6	6	0	0	0	0	0	0	0	0	0	0	0	0
Tenericutes			1206	763	453	157	88	784	459	358	30	523	57	428	29	277	71	861	529	268	92	430	155	328	87	424	42	850	149
		Environmental samples	0	328	0	0	0	0	0	0	0	0	0	45	0	0	0	0	0	0	0	0	0	0	0	0	0	0	0
		Candidatus_Izimplasma	0	0	0	0	0	0	0	0	0	0	0	0	0	0	0	70	70	0	0	0	0	0	0	0	0	0	0
		Unclassified Tenericutes	0	0	0	0	0	0	0	24	24	0	0	0	0	0	0	0	0	0	0	0	0	0	0	0	0	0	0
	Mollicutes		1200	427	452	157	88	781	459	329	6	478	57	380	29	273	71	789	459	267	92	427	155	322	87	420	42	846	149
		Acholeplasmatales	17	75	28	0	0	22	0	33	0	54	31	9	0	54	0	20	15	40	12	36	13	24	0	78	0	35	15
		Anaeroplasmatales	0	0	0	0	0	0	0	0	0	0	0	0	0	0	0	0	0	0	0	0	0	0	0	0	0	7	7
		Entomoplasmatales	22	217	112	8	0	146	0	38	6	67	16	63	15	25	6	198	6	80	50	38	0	31	0	123	0	55	17
		Mycoplasmatales	1154	129	312	148	88	613	459	258	0	357	10	304	14	183	65	571	438	145	30	351	142	265	87	206	34	747	110
		Unclassified_Mollicutes	0	0	0	0	0	0	0	0	0	0	0	0	0	0	0	0	0	0	0	0	0	0	0	8	8	0	0
Chloroflexi			151	431	227	0	0	53	7	184	47	214	56	157	49	156	12	291	110	119	36	799	344	551	27	1271	705	101	0
		Environmental samples	45	174	0	0	0	7	0	53	0	42	0	16	0	21	0	24	0	0	0	115	0	68	0	200	0	35	0
		Unclassified Chloroflexi	0	0	0	0	0	0	0	15	15	0	0	0	0	0	0	0	0	0	0	0	0	0	0	0	0	0	0
	Anaerolineae		29	30	59	0	0	19	0	28	0	22	0	19	10	39	6	60	24	15	0	90	0	31	9	188	155	25	0
		Anaerolineales	29	30	59	0	0	19	0	28	0	22	0	19	10	39	6	55	24	0	0	90	0	31	9	50	17	25	0
		Environmental samples	0	0	0	0	0	0	0	0	0	0	0	0	0	0	0	0	0	0	0	0	0	0	0	138	138	0	0
	Ardenticatenia		0	30	0	0	0	0	0	0	0	16	0	23	0	0	0	0	0	15	0	6	0	0	0	8	0	11	0
		Ardenticatenales	0	30	0	0	0	0	0	0	0	16	0	23	0	0	0	0	0	0	0	6	0	0	0	8	0	11	0
	Caldilineae		27	164	0	0	0	6	0	9	0	17	7	33	19	11	6	23	8	16	7	21	0	111	10	65	0	15	0
		Caldilineales	27	164	0	0	0	6	0	8	0	17	7	33	19	11	6	23	8	16	7	21	0	111	10	65	0	15	0
	Chloroflexia		8	0	157	0	0	0	0	0	0	0	0	0	0	0	0	0	0	29	29	347	344	0	0	23	17	0	0
		Chloroflexales	8	0	127	0	0	0	0	0	0	0	0	0	0	0	0	0	0	29	29	345	344	0	0	22	17	0	0
		Herpetosiphonales	0	0	30	0	0	0	0	0	0	0	0	0	0	0	0	0	0	0	0	0	0	0	0	0	0	0	0
	Dehalococcoidia		7	15	0	0	0	8	7	13	0	23	0	47	20	10	0	101	78	38	0	187	0	77	0	98	25	0	0
		Dehalogenimonas**	0	0	0	0	0	7	7	0	0	0	0	20	20	0	0	78	78	0	0	0	0	0	0	25	25	0	0
		Dehalococcoidales	7	11	0	0	0	0	0	8	0	19	0	27	0	9	0	23	0	34	0	185	0	72	0	73	0	0	0
	Ktedonobacteria		20	10	0	0	0	0	0	41	32	7	0	7	0	64	0	74	0	11	0	17	0	242	8	678	508	7	0
		Ktedonobacterales	19	9	0	0	0	0	0	40	32	7	0	7	0	63	0	74	0	11	0	16	0	233	0	674	508	0	0
		Thermogemmatisporales	0	0	0	0	0	0	0	0	0	0	0	0	0	0	0	0	0	0	0	0	0	8	8	0	0	0	0
	Thermomicrobia		0	0	0	0	0	0	0	0	0	49	49	0	0	0	0	0	0	0	0	0	0	0	0	0	0	0	0
		Sphaerobacterales	0	0	0	0	0	0	0	0	0	49	49	0	0	0	0	0	0	0	0	0	0	0	0	0	0	0	0
Deinococcus-Thermus			115	113	528	0	0	63	28	68	0	424	0	440	0	64	25	105	0	105	8	117	35	249	156	544	468	59	0
	Deinococci		115	113	528	0	0	63	28	68	0	424	0	440	0	64	25	104	0	105	8	117	35	248	156	544	468	59	0
		Thermales	80	63	459	0	0	7	0	20	0	9	0	416	0	0	0	73	0	49	0	53	0	71	0	438	423	46	0
		Deinococcales	29	50	69	0	0	56	28	48	0	415	0	24	0	61	25	29	0	56	8	64	35	177	156	102	45	13	0
Armatimonadetes			47	9	55	0	0	0	0	10	0	35	15	53	0	99	25	48	13	27	6	61	45	176	0	186	44	170	26
		Environmental samples	0	0	0	0	0	0	0	0	0	0	0	0	0	11	11	0	0	0	0	0	0	0	0	0	0	0	0
		Unclassified Armatimonadetes	9	0	55	0	0	0	0	0	0	17	15	0	0	47	14	33	13	6	6	52	45	0	0	55	44	33	26
	Chthonomonadetes		27	0	0	0	0	0	0	0	0	10	0	46	0	6	0	0	0	10	0	0	0	0	0	86	0	6	0
		Chtlonomonadales	27	0	0	0	0	0	0	0	0	10	0	46	0	6	0	0	0	10	0	0	0	0	0	86	0	6	0
	Fimbriimonadia		8	0	0	0	0	9	0	6	0	0	0	0	0	18	0	8	0	11	0	6	0	19	0	39	0	0	0
		Fimbriiimonadales	8	0	0	0	0	9	0	6	0	0	0	0	0	18	0	8	0	11	0	6	0	19	0	39	0	0	0
FCB group			10381	5072	15730	2276	72	10574	1228	3222	296	5371	838	4815	594	23688	18739	8334	827	5475	344	10801	1495	7279	710	13796	1533	6620	750
Bacteroidetes/Chlorobi group			9986	4986	15704	2276	72	9837	1219	3217	296	5352	838	4680	594	23649	18732	7384	821	5271	344	10627	1489	6931	704	13577	1524	6588	738
Bacteroidetes			9619	4943	15645	2274	72	9824	1219	3207	296	5312	838	4621	564	23649	18602	7303	814	4784	336	10561	1489	6907	704	13537	1524	6524	738
		Bacteroidetes_Order_II_Incertae_Sedis	0	26	99	0	0	13	0	0	0	44	0	0	0	0	0	43	0	4784	0	10	0	41	0	22	0	0	0
		Environmental samples	267	47	0	0	0	28	0	49	0	172	0	0	0	55	0	100	0	0	0	556	0	277	0	176	0	69	0
		Unclassified Bacteroidetes	114	33	12	0	0	42	0	23	0	51	0	23	0	117	0	100	0	80	0	56	0	200	0	602	0	47	0
	Bacteroidia		743	167	1125	17	10	100	42	389	89	378	59	161	36	323	151	1243	244	146	31	290	60	343	95	527	104	348	70
		Bacteroidales	693	155	914	15	10	91	42	159	89	362	59	137	36	255	151	839	244	133	31	258	60	301	95	448	104	274	70
		Marinilabiliales	50	11	211	0	0	9	0	230	0	16	0	23	0	67	0	404	0	13	0	31	0	40	0	78	0	74	0
	Chitinophagia		957	566	256	66	0	1405	715	203	6	156	28	270	72	370	11	628	143	376	0	578	42	543	51	985	95	524	0
		Chitinophagales	957	566	256	66	0	1405	715	203	0	156	28	270	72	370	11	628	143	376	0	578	42	543	51	985	95	524	0
	Cytophagia		1609	762	786	13	0	448	127	533	15	630	57	761	60	611	53	926	6	1067	11	760	27	697	29	1701	186	424	33
		Cytophagales	1609	762	786	13	0	448	127	533	0	630	57	761	60	611	53	926	6	1067	11	760	27	697	29	1701	186	424	33
	Flavobacteriia		5253	3128	12397	2011	62	6980	335	1726	139	3537	684	2680	331	21688	18379	3717	278	2480	274	7314	1341	4197	498	7437	697	4312	500
		Environmental samples	0	44	0	0	0	0	0	8	0	0	0	15	0	0	0	0	0	0	0	0	0	0	0	11	0	0	0
		Flavobacteriales	5247	3079	12397	2011	62	6978	335	1708	129	3533	684	2665	331	21686	18379	3717	278	2477	274	7310	1341	4195	498	7426	697	4312	500
		Unclassified_Flavobacteria	0	0	0	0	0	0	0	10	10	0	0	0	0	0	0	0	0	0	0	0	0	0	0	0	0	0	0
	Saprospiria		217	9	21	124	0	16	0	19	0	47	0	13	0	34	0	35	0	20	0	32	0	73	0	111	0	19	0
		Saprospirales	217	9	21	124	0	16	0	19	0	47	0	13	0	34	0	35	0	20	0	32	0	73	0	111	0	19	0
	Sphingobacteriia		249	92	852	43	0	123	0	202	47	100	10	411	65	208	8	287	143	193	20	731	19	365	31	795	442	605	135
		Environmental samples	94	0	0	0	0	32	0	18	0	31	0	87	0	37	0	27	0	0	0	209	0	20	0	147	8	37	0
		Sphingobacteriales	155	86	852	43	0	91	0	184	47	69	10	278	65	171	8	260	143	0	20	522	19	345	31	641	434	565	135
Balneolaeota			0	0	0	0	0	0	0	0	0	0	0	0	0	0	0	0	0	8	8	0	0	0	0	0	0	0	0
		unclassified_Balneolata	0	0	0	0	0	0	0	0	0	0	0	0	0	0	0	0	0	8	8	0	0	0	0	0	0	0	0
Chlorobi			105	22	32	0	0	9	0	0	0	38	0	56	30	149	130	75	7	472	0	21	0	18	0	21	0	61	0
		Environmental samples	0	0	0	0	0	0	0	0	0	0	0	14	14	0	0	0	0	0	0	0	0	0	0	0	0	0	0
	Chlorobia		101	20	32	0	0	7	0	0	0	34	0	42	16	144	130	72	7	472	0	19	0	18	0	17	0	58	0
		Chlorobiales	101	20	32	0	0	7	0	0	0	34	0	42	16	144	130	72	7	472	0	19	0	18	0	17	0	58	0
Ignavibacteriae			621	0	27	0	0	0	0	8	0	0	0	0	0	0	0	6	0	7	0	40	0	0	0	17	0	0	0
	Ignavibacteria		261	0	27	0	0	0	0	8	0	0	0	0	0	0	0	6	0	7	0	40	0	0	0	17	0	0	0
		Ignavibacteriales	261	0	27	0	0	0	0	8	0	0	0	0	0	0	0	6	0	7	0	40	0	0	0	17	0	0	0
Gemmatimonadetes			367	97	19	0	0	736	9	0	0	7	0	131	0	31	0	943	6	56	0	150	6	339	0	186	0	12	0
		Environmental samples	0	0	0	0	0	9	9	0	0	0	0	0	0	0	0	0	0	0	0	6	6	0	0	0	0	0	0
	Gemmatimonadetes		365	94	19	0	0	727	0	0	0	0	0	131	0	30	0	941	6	56	0	144	0	338	0	186	0	12	0
		Gemmatimonadales	365	94	19	0	0	727	0	0	0	0	0	131	0	30	0	941	6	56	0	144	0	338	0	186	0	12	0
Candidatus_Cloacimonetes			0	0	7	0	0	0	0	0	0	0	0	0	0	0	0	0	0	132	0	15	0	0	0	13	0	0	0
Candidatus Latescibateria			0	0	0	0	0	0	0	0	0	0	0	0	0	0	0	0	0	7	0	0	0	0	0	9	0	0	0
		Environmental samples	25	0	0	0	0	0	0	0	0	0	0	0	0	0	0	0	0	7	0	0	0	0	0	9	0	0	0
Candidatus_Marinimicrobia			0	0	0	0	0	0	0	0	0	0	0	0	0	7	7	0	0	0	0	0	0	6	6	9	9	12	12
PVC group			8094	7629	668	6	0	3334	0	2829	24	7302	51	16115	74	7099	442	12001	85	12303	129	13502	140	7295	184	15039	555	7476	73
Candidatus_Omnitrophica			0	9	0	0	0	0	0	0	0	10	0	0	0	0	0	0	0	0	0	6	0	0	0	0	0	0	0
Chlamydiae			157	61	10	0	0	44	0	81	9	363	0	118	50	548	294	175	31	1029	123	223	16	327	36	1169	173	100	33
	Chlamydiia		157	61	10	0	0	44	0	81	9	363	8	118	50	548	294	175	31	1029	123	223	16	327	36	1169	173	100	33
		Environmental samples	0	0	0	0	0	0	0	0	0	0	0	0	0	241	241	0	0	0	0	0	0	0	0	0	0	0	0
		Chlamydiales	7	0	8	0	0	0	0	23	9	22	8	51	50	21	18	42	25	33	26	34	10	24	17	133	75	38	26
		Parachlamydiales	125	59	0	0	0	42	0	57	0	338	0	65	0	260	35	132	6	993	97	186	6	276	19	1033	98	60	7
Kiritimatiellaeota			0	0	6	0	0	0	0	0	0	0	0	0	0	17	17	9	9	0	0	0	0	6	6	0	0	0	0
	Kiritimatiellae		0	0	6	0	0	0	0	0	0	0	0	0	0	17	17	9	9	0	0	0	0	6	6	0	0	0	0
		Kiritimatiellales	0	0	6	0	0	0	0	0	0	0	0	0	0	17	17	9	9	0	0	0	0	6	6	0	0	0	0
Lentisphaerae			9	0	0	0	0	9	0	0	0	25	0	0	0	0	0	0	0	0	0	8	0	7	0	0	0	0	0
	Lentisphaeria		8	0	0	0	0	7	0	0	0	25	0	0	0	0	0	0	0	0	0	7	0	0	0	0	0	0	0
		Victivallales	8	0	0	0	0	7	0	0	0	25	0	0	0	0	0	0	0	0	0	7	0	0	0	0	0	0	0
Planctomycetes			2535	3320	544	0	0	1149	0	1081	0	2375	31	1997	8	2013	0	2735	25	1421	0	4998	64	2263	20	6607	82	2815	17
		Candidatus_Brocadiae	12	21	0	0	0	0	0	0	0	35	25	0	0	0	0	0	0	6	0	0	0	30	0	59	51	85	0
	Planctomycetia		2462	3160	533	0	0	1110	0	1073	0	2273	6	1970	8	1976	0	2664	25	1344	0	4716	6	2173	20	6065	31	2607	17
		Planctomycetales	2462	3160	533	0	0	1110	0	1073	0	2272	6	1969	8	1976	0	2260	25	1344	0	4715	6	2173	20	6062	31	2607	17
	Phycisphaerae		31	55	10	0	0	26	0	0	0	21	0	23	0	9	0	30	0	26	0	237	58	23	0	430	0	110	0
		Phycisphaerales	6	0	0	0	0	0	0	0	0	0	0	0	0	0	0	0	0	6	0	30	0	0	0	7	0	0	0
		Sedimentisphaerales	0	0	10	0	0	0	0	0	0	21	0	0	0	0	0	0	0	0	0	63	58	0	0	0	0	0	0
		Unclassified_Phycisphaerae	8	42	0	0	0	23	0	0	0	0	0	16	0	0	0	0	0	9	0	113	0	10	0	129	0	33	0
Verrucomicrobia			5390	4236	108	0	0	2130	0	1664	15	4529	12	13996	16	4518	131	9082	20	9844	6	8263	60	4691	122	7254	300	4559	23
		Environmental samples	456	337	15	0	0	216	0	108	0	581	0	1302	0	736	0	1087	0	2526	0	774	10	515	0	1170	6	550	0
		Unclassified_Verrucomicrobia	0	6	0	0	0	0	0	0	0	7	0	0	0	0	0	10	0	0	0	15	10	6	0	6	0	0	0
	Methylacidiphilae		144	40	0	0	0	19	0	10	0	26	0	18	0	18	0	81	0	20	0	105	0	38	0	99	0	57	0
		Methylacidiphilales	144	40	0	0	0	19	0	10	0	26	0	18	0	18	0	81	0	20	0	105	0	38	0	99	0	57	0
	Opitutae		149	63	46	0	0	82	0	107	15	37	0	90	16	91	71	243	12	507	0	207	34	198	122	386	127	41	14
		Puniceicoccales	14	8	15	0	0	36	0	17	0	0	0	10	0	0	0	233	0	13	0	19	0	17	10	146	114	0	0
		Opituales	133	55	31	0	0	46	0	90	15	32	0	80	16	87	71	10	12	494	0	207	0	181	112	239	13	39	14
	Spartobacteria		36	103	0	0	0	28	0	9	0	140	0	19	0	41	18	136	0	20	0	23	0	15	0	56	0	30	0
		Candidatus_Xiphinematobacter	24	6	0	0	0	15	0	0	0	65	0	12	0	13	0	136	0	16	0	21	0	0	0	8	0	30	0
		Chthoniobacterales	12	97	0	0	0	13	0	9	0	75	0	6	0	10	0	8	0	0	0	0	0	12	0	48	0	0	0
		Environmental samples	0	0	0	0	0	0	0	0	0	0	0	0	0	18	18	0	0	0	0	0	0	0	0	0	0	0	0
	Verrucomicrobiae		3978	3355	41	0	0	1351	0	1348	0	3178	12	5283	0	3141	42	5579	8	2914	6	5818	6	3122	0	4876	167	3060	9
		Environmental samples	0	10	0	0	0	0	0	0	0	0	0	5282	0	0	0	11	0	0	0	6	0	0	0	0	0	0	0
		Verrucomicrobiales	3978	3345	41	0	0	1351	0	1348	0	3178	12	0	0	3139	42	5568	8	2913	6	5812	6	3122	0	4875	167	3059	9
without group			--	--	--	--	--	--	--	--	--	--	--	--	--	--	--	--	--	--	--	--	--	--	--	--	--	--	--
Acidobacteria			740	200	638	0	0	55	6	71	10	198	51	77	8	438	9	130	17	132	0	403	46	147	21	967	423	265	8
		Environmental samples	229	139	0	0	0	24	0	26	0	69	0	57	0	105	0	75	0	59	0	171	0	106	0	408	0	235	0
		Unclasified_Acidobacteria	0	0	26	0	0	0	0	0	0	0	0	0	0	0	0	0	0	0	0	0	0	0	0	0	0	0	0
	Acidobacteriia		73	15	608	0	0	13	6	15	10	88	51	16	8	320	9	26	17	30	0	192	46	26	21	473	395	21	8
		Acidiobacteriales	57	11	608	0	0	7	0	0	0	79	42	8	0	294	0	16	9	29	0	158	12	0	0	202	124	19	8
		Bryobacterales	0	0	0	0	0	6	6	10	10	9	9	8	8	9	9	8	8	0	0	34	34	21	21	271	271	0	0
	Blastocatellia		430	20	0	0	0	0	0	20	0	0	0	0	0	0	0	20	0	27	0	26	0	0	0	50	0	0	0
	Holophagae		0	16	0	0	0	14	0	0	0	23	0	0	0	0	0	0	0	0	0	0	0	0	0	28	28	0	0
		Holophagales	0	16	0	0	0	0	0	0	0	0	0	0	0	0	0	0	0	0	0	0	0	0	0	28	28	0	0
	Vicinamibacteria		0	7	0	0	0	0	0	0	0	8	0	0	0	8	0	0	0	0	0	6	0	0	0	0	0	0	0
Aquificae			29	35	6	0	0	8	6	42	0	19	0	50	44	63	21	8	0	68	54	20	0	13	0	15	9	10	0
	Aquificae		29	35	6	0	0	8	6	42	0	19	0	50	44	63	21	8	0	68	54	20	0	13	0	15	9	10	0
		Aquificales	21	35	0	0	0	0	0	42	0	12	0	20	14	63	21	7	0	68	54	19	0	12	0	15	9	0	0
		Desulfurobacteriales	8	0	0	0	0	6	6	0	0	7	0	30	30	0	0	0	0	0	0	0	0	0	0	0	0	0	0
Coprothermobacterota			0	0	0	0	0	18	18	0	0	0	0	0	0	0	0	18	18	12	12	24	24	10	10	100	100	17	17
	Coprothermobacteria		0	0	0	0	0	18	18	0	0	0	0	0	0	0	0	18	18	12	12	24	24	10	10	100	100	17	17
		Coprotermobacterales	0	0	0	0	0	18	18	0	0	0	0	0	0	0	0	18	18	12	12	24	24	10	10	100	100	17	17
Calditrichaeota			0	0	0	0	0	0	0	0	0	6	6	0	0	0	0	0	0	6	6	0	0	20	20	0	0	0	0
	Calditrichae		0	0	0	0	0	0	0	0	0	6	6	0	0	0	0	0	0	6	6	0	0	20	20	0	0	0	0
		Calditrichales	0	0	0	0	0	0	0	0	0	6	6	0	0	0	0	0	0	6	6	0	0	20	20	0	0	0	0
Chrysiogenetes			0	0	0	0	0	0	0	0	0	0	0	0	0	0	0	0	0	0	0	0	0	0	0	79	79	0	0
	Chrysiogenetes		0	0	0	0	0	0	0	0	0	0	0	0	0	0	0	0	0	0	0	0	0	0	0	79	79	0	0
		Chrysiogenales	0	0	0	0	0	0	0	0	0	0	0	0	0	0	0	0	0	0	0	0	0	0	0	79	79	0	0
Caldiserica/Cryosericota group			0	0	0	0	0	68	68	0	0	0	0	0	0	0	0	0	0	0	0	0	0	0	0	22	22	63	63
Caldiserica			0	0	0	0	0	68	68	0	0	0	0	0	0	0	0	0	0	0	0	0	0	0	0	22	22	63	63
	Caldisericia		0	0	0	0	0	68	68	0	0	0	0	0	0	0	0	0	0	0	0	0	0	0	0	22	22	63	63
		Caldisericales	0	0	0	0	0	68	68	0	0	0	0	0	0	0	0	0	0	0	0	0	0	0	0	22	22	63	63
Deferribacteres			34	13	63	0	0	0	0	136	132	43	32	0	0	0	0	10	0	206	190	16	0	25	0	81	11	8	0
	Deferribacteres		34	13	63	0	0	0	0	136	132	43	32	0	0	0	0	10	0	206	190	16	0	25	0	81	11	8	0
		Deferribacterales	34	13	63	0	0	0	0	136	132	43	32	0	0	0	0	10	0	206	190	16	0	25	0	81	11	6	0
Dictyoglomi			0	0	6	0	0	0	0	133	133	0	0	26	0	0	0	0	0	0	0	0	0	6	0	30	26	0	0
	Dictyglomia		0	0	6	0	0	0	0	133	133	0	0	26	0	0	0	0	0	0	0	0	0	6	0	30	26	0	0
		Dictyglomales	0	0	6	0	0	0	0	133	133	0	0	26	0	0	0	0	0	0	0	0	0	6	0	30	26	0	0
Elusimicrobia			17	8	0	0	0	31	24	0	0	0	0	0	0	0	0	14	0	6	0	62	0	27	18	16	0	7	0
	Elusimicrobia		0	8	0	0	0	0	0	0	0	0	0	0	0	0	0	7	0	0	0	35	0	9	0	11	0	0	0
		Elusimicrobiales	0	8	0	0	0	0	0	0	0	0	0	0	0	0	0	7	0	0	0	35	0	9	0	11	0	0	0
	Endomicrobia		12	0	0	0	0	27	24	0	0	0	0	0	0	0	0	7	0	0	0	26	0	18	18	0	0	0	0
		Endomicrobiales	12	0	0	0	0	27	24	0	0	0	0	0	0	0	0	7	0	0	0	26	0	18	18	0	0	0	0
Fusobacteria			195	30	258	22	0	42	19	104	0	682	645	120	0	44	0	222	54	1451	0	95	17	124	20	166	23	299	19
	Fusobacteriia		195	30	258	22	0	42	19	104	0	682	645	120	0	41	0	222	54	1451	0	95	17	124	20	166	23	299	19
		Fusobacteriales	195	30	258	22	0	42	19	104	0	682	645	120	0	41	0	222	54	1451	0	95	17	124	20	166	23	299	19
Nitrospirae			110	27	101	11	11	21	0	31	6	17	0	10	0	25	0	32	0	71	21	117	0	53	6	101	46	21	0
		Environmental samples	0	0	0	0	0	0	0	0	0	0	0	0	0	0	0	0	0	0	0	0	0	6	6	42	40	0	0
	Nitrospira		81	27	101	11	11	21	0	30	6	16	0	10	0	21	0	24	0	50	21	44	0	30	0	51	6	20	0
		Nitrospirales	81	27	101	11	11	21	0	30	6	16	0	10	0	21	0	24	0	50	21	44	0	0	0	51	6	20	0
Thermodesulfobacteria			11	7	20	0	0	0	0	39	16	0	0	0	0	6	0	11	0	0	0	177	0	6	0	0	0	7	0
	Thermodesulphobacteria		11	7	20	0	0	0	0	39	16	0	0	0	0	6	0	11	0	0	0	177	0	6	0	0	0	7	0
		Thermosulphobacteriales	11	7	20	0	0	0	0	39	16	0	0	0	0	6	0	11	0	0	0	117	0	6	0	0	0	7	0
Thermotogae			39	12	139	0	0	38	23	0	0	55	7	149	136	16	0	55	28	15	0	86	54	64	27	137	7	33	0
	Thermotogae		39	12	139	0	0	38	26	0	0	55	7	0	136	16	0	55	28	15	0	86	54	64	27	137	7	33	0
		Kosmotogales	10	0	0	0	0	0	0	0	0	0	0	7	0	0	0	13	13	0	0	0	0	0	0	0	0	7	0
		Petrotogales	17	0	122	0	0	15	8	0	0	25	7	62	59	0	0	18	0	6	0	34	7	21	0	19	0	11	0
		Thermotogales	10	0	17	0	0	23	15	0	0	30	0	80	77	7	0	24	15	0	0	49	47	36	27	113	7	15	0
Spirochaetes			161	794	97	44	35	114	42	0	0	0	0	140	31	160	41	407	78	406	256	272	81	323	51	227	67	868	16
	Spirochaetia		161	794	97	44	35	114	42	0	0	0	0	140	31	159	41	407	78	406	356	272	81	323	51	226	67	868	16
		Brachyspirales	0	717	27	0	0	34	16	0	0	0	0	25	0	0	0	27	14	9	0	14	0	0	0	9	0	761	0
		Leptospirales	38	25	21	0	0	25	6	0	0	0	0	71	23	47	0	48	0	22	0	142	0	69	0	19	6	13	0
		Spirochaetales	119	52	49	42	35	55	20	0	0	0	0	44	8	159	41	332	64	375	356	116	81	250	51	198	61	94	16
Synergistetes			9	13	0	0	0	42	37	0	0	20	8	0	0	11	0	13	0	12	0	8	0	14	8	26	12	19	13
	Synergistia		9	13	0	0	0	41	37	0	0	20	8	0	0	11	0	13	0	12	0	8	0	14	8	26	12	19	13
		Synergistales	9	13	0	0	0	41	37	0	0	20	8	0	0	11	0	13	0	12	0	8	0	14	8	26	12	19	13
