# Supplementary material for: High-Depth Viral Blood Metagenomics Reveals Extensive Anellovirus Diversity in Healthy Humans
Source: Research Square preprint supplement (doi:10.21203/rs.3.rs-115092/v1), 2020-12-04
Supplement: Supplementary file 9 [file cf4c3a55d9ef8ce6212e2edb.docx]

|  | DNA libraries | | | | RNA libraries | | | |
| --- | --- | --- | --- | --- | --- | --- | --- | --- |
|  | Direct extraction | | High centrifugation | | Direct extraction | | High centrifugation | |
|  | 0.45 m | 1.0 m | 0.45 m | 1.0 m | 0.45 m | 1.0 m | 0.45 m | 1.0 m |
| # total reads | 2,468,272 | 2,774,265 | 797,932 | 835,504 | 3,183,681 | 1,875,367 | 3,002,159 | 2,456,356 |
| # classified reads | 2,239,658 | 2,564,339 | 423,371 | 426,179 | 2,456,161 | 1,467,206 | 2,217,843 | 1,894,847 |
| Human reads | 1,703,816 | 1,847,017 | 3,805 | 1,569 | 2,291 | 469 | 24,740 | 15,632 |
| Bacterial reads | 1,910 | 1,700 | 6,692 | 10,521 | 989,058 | 515,922 | 691,516 | 558,861 |
| VV reads | 229 | 7,327 | 0 | 2,121 | 0 | 0 | 0 | 0 |
| φX174 reads | 7,028 | 4,191 | 40,894 | 35,543 | 0 | 0 | 0 | 0 |
| VSV reads | 0 | 0 | 0 | 0 | 0 | 0 | 7,416 | 2,594 |
| MS2 reads | 0 | 0 | 0 | 0 | 20 | 0 | 91 | 0 |
| Anellovirus reads | 15,314 | 11,839 | 125,326 | 139,733 | 0 | 0 | 0 | 0 |
| Other viruses | 1,599 | 3,318 | 3,165 | 5,691 | 7,029 | 5,108 | 5,549 | 3,753 |
