# Supplementary material for: High-Depth Viral Blood Metagenomics Reveals Extensive Anellovirus Diversity in Healthy Humans
Source: Research Square preprint supplement (doi:10.21203/rs.3.rs-115092/v1), 2020-12-04
Supplement: Supplementary file 10 [file f09a2651cbf61da62771e4ac.docx]

| Pool | # total reads | % classified reads | Human reads | Bacterial reads | Anellovirus reads | Other viruses |
| --- | --- | --- | --- | --- | --- | --- |
| P1 | 835,504 | 51.0 | 1,569 | 10,521 | 139,733 | 5,691 |
| P2 | 1,948,103 | 34.2 | 16,358 | 71,069 | 115,056 | 11,844 |
| P3 | 1,008,317 | 41.6 | 4,692 | 53,955 | 106,777 | 12,167 |
| P4 | 1,909,824 | 43.0 | 9,858 | 97,127 | 127,343 | 10,850 |
| P5 | 2,420,824 | 30.9 | 10,548 | 160,281 | 15,765 | 18,925 |
| P6 | 2,706,682 | 28.7 | 10,245 | 115,824 | 7,374 | 1,430 |
| P7 | 1,771,038 | 51.6 | 21,501 | 91,951 | 304,349 | 8,002 |
| P8 | 1,712,606 | 45.2 | 18,027 | 95,479 | 168,675 | 19,634 |
| P9 | 2,042,540 | 60.8 | 11,636 | 118,152 | 461,043 | 23,702 |
| P10 | 1,541,190 | 52.3 | 22,740 | 102,393 | 137,047 | 4,496 |
| P11 | 2,390,182 | 45.3 | 8,684 | 176,473 | 26,571 | 16,312 |
| P12 | 1,935,479 | 41.3 | 2,869 | 92,920 | 55,498 | 8,863 |
