# Supplementary material for: High-Depth Viral Blood Metagenomics Reveals Extensive Anellovirus Diversity in Healthy Humans
Source: Research Square preprint supplement (doi:10.21203/rs.3.rs-115092/v1), 2020-12-04
Supplement: Supplementary file 11 [file 33b7befc08691aa5c988268d.xlsx]

## Sheet: Hoja1
Isolate/contig name	Contig length (nt)	Coverage (spades)	ORF1 size (aa)	Accession number	Genus
P1-c1	3687	89.3537	765		TTV
P1-c2	3569	107.432	745		TTV
P1-c3	3487	14.8065	757		TTV
P1-c4	3243	7.62476	772		TTV
P1-c5	3154	37.4605	735		TTV
P1-c6	3120	56.3523	756		TTV
P1-c7	3108	10.29	775		TTV
P1-c8	3091	18.7027	768		TTV
P1-c10	2987	4.62887	752		TTV
P1-c12*	2894	119.952	675		TTMV
P1-c13	2955	12.4343	762		TTV
P1-c14	2947	19.2467	732		TTV
P1-c15*	2859	697.487	650		TTMV
P1-c16*	2853	249.608	654		TTMV
P1-c17	2926	14.98	738		TTV
P1-c18	2887	9.9968	739		TTV
P1-c19	2555	7.32123	682		TTMDV
P1-c20**	2289	21.514	635		TTV
P1-c21**	2257	2.0078	732		TTV
P1-c22**	2051	114.541	596		TTMV
P1-c23	3092	156.524	652		TTMDV
P1-c24*	2912	59.9076	660		TTMV
P1-c25*	2897	105.872	656		TTMV
P1-c26	2576	24.7643	661		TTMDV
P1-c27	2572	758.964	659		TTMDV
P2-c2	3175	45.2728	736		TTV
P2-c3	3169	34.3933	746		TTV
P2-c4	3074	11.3156	740		TTV
P2-c5	3051	24.0736	739		TTV
P2-c6	3001	13.6245	767		TTV
P2-c7	2904	30.8896	732		TTV
P2-c8	2567	45.8129	669		TTMDV
P2-c9**	2379	1.55082	670		TTV
P2-c10**	2341	2.79152	677		TTV
P3-c1	3160	10.0279	743		TTV
P3-c2	3125	27.96	731		TTV
P3-c3	3022	4.0764	771		TTV
P3-c4*	2885	6.2176	652		TTMV
P3-c5	2796	34.3895	665		TTMDV
P3-c6	3309	125.102	746		TTV
P3-c7	3215	14.9089	756		TTV
P3-c8*	2989	351.309	673		TTMV
P3-c9*	2810	98.6823	653		TTMV
P4-c1	3709	32.4491	739		TTV
P4-c2	2968	33.7662	741		TTV
P4-c3	2865	3.28336	732		TTV
P4-c4*	2777	23.1664	634		TTMV
P5-c1	3235	39.488	762		TTV
P5-c2	2241	1.96165	676		TTMV
P6-c1	3826	64.813	781		TTV
P6-c2	3135	9.15566	786		TTV
P6-c3*	2839	124.465	659		TTMV
P7-c1	3328	25.9434	755		TTV
P7-c2	3280	278.085	758		TTV
P7-c3	3268	105.408	676		TTMDV
P7-c4	3243	46.5196	769		TTV
P7-c5	3081	42.3212	767		TTV
P7-c6	3065	32.9297	755		TTV
P7-c7	3042	312.795	625		TTMV
P7-c8	2987	30.8247	761		TTV
P7-c9	2958	165.555	743		TTV
P7-c10	2950	55.8267	745		TTV
P7-c12*	2854	108.436	667		TTMV
P7-c14	2785	3.21935	680		TTMV
P7-c16	2711	29.0615	732		TTV
P7-c17	2606	118.732	661		TTMDV
P7-c18	2557	91.8629	661		TTMDV
P7-c19	2550	76.6915	662		TTMDV
P7-c20*	2098	5.49571	653		TTMDV
P7-c21*	2866	157.934	653		TTMV
P7-c22	2915	482.308	665		TTMDV
P7-c23*	2837	526.3	659		TTMV
P7-c24	2634	150.744	659		TTMDV
P7-c25	2565	49.3095	666		TTMDV
P8-c1	3215	64.2948	756		TTV
P8-c2	3201	27.9859	763		TTV
P8-c3	3181	18.8663	767		TTV
P8-c4	3134	2.91331	751		TTV
P8-c5	3075	48.9566	782		TTV
P8-c6*	2988	12.8872	668		TTMV
P8-c8	3013	22.6257	780		TTV
P8-c9	3000	34.5258	743		TTV
P8-c10	2988	43.3669	754		TTV
P8-c13	2927	21.7642	739		TTV
P8-c16*	2810	52.4801	653		TTMV
P8-c17*	2810	156.852	642		TTMV
P8-c18	2546	13.0482	667		TTMDV
P8-c20**	2252	109.583	613		TTV
P8-c21**	2146	14.0822	603		TTMV
P8-c22*	2947	142.881	666		TTMV
P8-c23*	2860	53.6783	548		TTMV
P8-c24*	2851	14.3174	663		TTMV
P8-c25*	2848	132.744	659		TTMV
P8-c26*	2824	51.8661	646		TTMV
P9-c1	3763	43.4816	766		TTV
P9-c2	3130	5.98723	733		TTV
P9-c3	3057	72.1745	660		TTMV
P9-c4	2996	16.4279	756		TTV
P9-c5	2475	9.27386	659		TTMDV
P9-c6	2881	13.0032	765		TTV
P10-c2	3717	62.9687	739		TTV
P10-c3	3655	71.4564	733		TTV
P10-c4	3195	16.5856	752		TTV
P10-c5	3191	29.1631	766		TTV
P10-c6	2961	13.0853	743		TTV
P10-c7	2926	18.0534	731		TTV
P10-c8*	2779	11.7893	642		TTMV
P10-c9	2874	15.5863	673		TTMV
P11-c1	3160	22.7256	642		TTV
P11-c2	3088	7.27267	786		TTV
P12-c1	3741	30.1837	739		TTV
P12-c2	3007	18.0696	757		TTV
P12-c3	2568	6.15817	666		TTMDV
P12-c4**	1806	14.9312	518		TTV
*complete genome
**partial ORF1
