# Supplementary material for: High-Depth Viral Blood Metagenomics Reveals Extensive Anellovirus Diversity in Healthy Humans
Source: Research Square preprint supplement (doi:10.21203/rs.3.rs-115092/v1), 2020-12-04
Supplement: Supplementary file 12 [file 3cd51b738c8d45fc151f061c.xlsx]

## Sheet: Hoja1
Accession number	Isolate name	Genus
AY823989	3h	TTV
AY823988	2h	TTV
MK452767	N119	TTV
MK452766	M265	TTV
MK690196	TTVMY01	TTV
MK820646	BD67	TTV
MK820645	FL08	TTV
MK820644	FL100*	TTV
FJ392117	TW53A37*	TTV
FJ392116	TW53A36	TTV
FJ392115	TW53A31	TTV
FJ392114	TW53A30*	TTV
FJ392112	TW53A39	TTV
FJ392111	TW53A35	TTV
FJ392109	TW53A32	TTV
FJ392108	TW53A29	TTV
FJ392107	TW53A27	TTV
FJ392105	TW53A25	TTV
KJ082064	TTV-Hebei-1	TTV
HM224451	L1984	TTV
FJ426280	SIA109	TTV
KT163917	P19-3	TTV
KT163916	P19-2	TTV
KT163915	P19-1	TTV
KT163912	P18-1	TTV
KT163911	P17	TTV
KT163906	P15-4	TTV
KT163905	P15-3	TTV
KT163904	P15-2	TTV
KT163903	P15-1	TTV
KT163902	P14-3	TTV
KT163901	P14-2	TTV
KT163900	P14-1	TTV
KT163897	P13-2	TTV
KT163896	P13-1	TTV
KT163893	P10-1	TTV
KT163887	P9-2	TTV
KT163886	P9-1	TTV
KT163885	P8	TTV
KT163880	P4-1	TTV
KT163879	P3	TTV
KT163875	P1-1	TTV
DQ361268	ViPi04*	TTV
DQ187005	BM1C-10	TTV
DQ187004	BM1C-16	TTV
DQ187002	BM1B-14	TTV
DQ187001	BM1B-11	TTV
DQ187000	BM1B-07	TTV
DQ186999	BM1B-05	TTV
DQ186998	BM1A-13	TTV
DQ186997	BM1A-09	TTV
DQ186996	BM1A-02	TTV
DQ186995	P605	TTV
DQ186994	P601	TTV
AJ620235	tth23	TTV
AJ620233	tth19	TTV
AJ620232	tth13	TTV
AJ620231	tth8	TTV
AJ620229	tth29	TTV
AJ620228	tth14	TTV
AJ620227	tth5	TTV
AJ620226	tth4	TTV
AJ620225	tth31	TTV
AJ620224	tth27	TTV
AJ620223	tth26	TTV
AJ620222	tth25	TTV
AJ620221	tth17	TTV
AJ620220	tth16	TTV
AJ620219	tth9	TTV
AJ620217	tth21	TTV
AJ620218	tth3	TTV
AJ620216	tth20*	TTV
AJ620215	tth18	TTV
AJ620213	tth10	TTV
AJ620212	tth6	TTV
AB011493	TX011(O)	TTV
AB011494	TY96117	TTV
AB011491	G88801	TTV
AB011490	G105001	TTV
AB011489	G104901	TTV
AB011488	G102001	TTV
AB011487	G103301	TTV
AB011486	G97801	TTV
AB064606	JT33F	TTV
AB064604	CT39F	TTV
AB064603	JT41F	TTV
AB064602	JT19F	TTV
AB064601	JT14F	TTV
AB064600	JT05F	TTV
AB064599	JT03F	TTV
AB064597	CT30F	TTV
AB064596	CT25F	TTV
AB060593	SAa-38	TTV
AB054648	23	TTV
AB050448	TYM9*	TTV
EU305676	LTT10	TTV
EU305675	LTT7	TTV
EU305674	LTT6	TTV
EF538879	CSC5	TTV
AF351132	TWH	TTV
AF298585	P/1C1	TTV
AF116842	BDH1	TTV
AF247138	T3PB	TTV
AF247137	TUPB	TTV
AF122920	US35	TTV
AF122917	JA4	TTV
AF122916	JA1	TTV
AF122915	JA9	TTV
AF122914	JA20	TTV
AF345529	TCHN-G2	TTV
AF345528	TCHN-F	TTV
AF345527	TCHN-C2*	TTV
AF345525	TCHN-D2	TTV
AF345522	TCHN-E	TTV
AF345521	TCHN-G1	TTV
AY026466	L02	TTV
AY026465	L01	TTV
AF254410	TTV021	TTV
AF122913	GH1	TTV
AF129887	TTVCHN2	TTV
AF079173	TTVCHN1	TTV
AB060595	SAj-30	TTV
AB060596	SAf-09	TTV
AB041821		TTV
AB030489	JaBD98	TTV
AB030488	JaBD89	TTV
AB030487	JaCHCTC19	TTV
AB030486	JaCHC2c	TTV
AB028669	TJN02	TTV
AB038624	TTVyon-KC197	TTV
AB038623	TTVyon-KC186	TTV
AB038622	TTVyon-LC011	TTV
AB038620	TTVsan-S039	TTV
AB038619	TTVsan-IR1031	TTV
AB038340	TRM1	TTV
AB026347	TP1-3	TTV
AB026346	TK16	TTV
AB026345	TRM1	TTV
AB008394	TA278*	TTV
AB025946	TTV_SANBAN*	TTV
AY666122	HEL32*	TTV
GU797360	BIS8-17	TTV
MH017587	BNI-701800-G4-SER	TTV
MH017586	BNI-701098-G4-CSF	TTV
MH017585	BNI-700907-G4-SER28	TTV
MH017584	BNI-700907-G4-SER0	TTV
MH017583	BNI-700907-G4-CSF	TTV
MH017582	BNI-700886-G4-CSF	TTV
MH017581	BNI-700835-G4-SER28	TTV
MH017579	BNI-700835-G4-CSF	TTV
MH017578	BNI-700831-G4-SER28	TTV
MH017577	BNI-700831-G4-SER0	TTV
MH017576	BNI-700742-G4-CSF	TTV
MH017575	BNI-700639-G4-SER0	TTV
MH017574	BNI-700639-G4-CSF	TTV
MH017573	BNI-700620-G4-SER0	TTV
MH017572	BNI-700620-G4-CSF	TTV
MH017571	BNI-700611-G4-CSF	TTV
MH017570	BNI-700199-G4-CSF	TTV
LC385663	KD5	TTV
LC385662	KD1	TTV
AF261761	PMV*	TTV
AF435014	KAV*	TTV
AB041007	VT416	TTV
AF348409	TCHN-B*	TTV
AF345526	TCHN-A*	TTV
AF345523	TCHN-C1*	TTV
AF345524	TCHN-D1*	TTV
AB017613	TUS01*	TTV
AB041958	Mf-TTV3*	TTV
AB064607	JT34F*	TTV
AB064605	CT44F*	TTV
AB064598	CT43F*	TTV
AB064595	CT23F*	TTV
AB060597	SAa-01*	TTV
AB060594	SAa-10*	TTV
AB054647	Kt-08F*	TTV
AB049608	s-TTV_CH71*	TTV
AB049607	s-TTV_CH65-2*	TTV
AB041959	Mf-TTV9*	TTV
AB041957	Pt-TTV6*	TTV
AB037926	s-TTV_CH65-1*	TTV
AB028668	TJN01*	TTV
AB038621	TTVyon-KC009*	TTV
MN116509	TTVMY02	TTV
KP036971	TTV-2013	TTV
KJ194503	TTV_Amsterdam_1994	TTV
KJ194502	TTV_Amsterdam_1995	TTV
DQ187006	TTV9-BM1C-18*	TTV
AX025830	TTV17-SENV-G*	TTV
AX025718	TTV18-SENV-C*	TTV
AX174942	TTV22-svi-1*	TTV
KU243129	TTMV-204*	TTMV
MH017549	BNI-700835-G1-CSF	TTMV
MK212031	vzttmv4*	TTMV
MK212030	vzttmv3*	TTMV
MK212029	vzttmv2	TTMV
MK139485	vzttmv1	TTMV
KY462770	SHA*	TTMV
KY462769	SH-A*	TTMV
KY462768	SH-C9	TTMV
KY462767	SHC11	TTMV
KY462766	SH-C8	TTMV
KY462765	SH-C7	TTMV
KY462764	SH-C6	TTMV
KY462763	SH-C5	TTMV
KY462762	SH-C4	TTMV
KY462761	SH-C3	TTMV
KY462760	SH-C2	TTMV
KY462759	SH-C1	TTMV
KY462758	SHC	TTMV
KY462757	SHC01	TTMV
KX810064	Emory2*	TTMV
KX810063	Emory1*	TTMV
KU041847	222*	TTMV
JX134046	TTMV_LY3*	TTMV
JX134045	TTMV_LY2	TTMV
JX134044	TTMV_LY1*	TTMV
EF538883	LIL-y4*	TTMV
MH017569	BNI-701098-G3-SER0	TTMV
MH017568	BNI-701098-G3-CSF	TTMV
MH017567	BNI-700907-G3-SER28	TTMV
MH017565	BNI-700886-G3-SER0	TTMV
MH017564	BNI-700886-G3-CSF	TTMV
MH017563	BNI-700835-G3-CSF	TTMV
MH017562	BNI-701800-G2-CSF*	TTMV
MH017561	BNI-701157-G2-SER0	TTMV
MH017560	BNI-701157-G2-CSF	TTMV
MH017559	BNI-700886-G2-SER0	TTMV
MH017558	BNI-700886-G2-CSF	TTMV
MH017557	BNI-700835-G2-SER28	TTMV
MH017556	BNI-700835-G2-SER0	TTMV
MH017555	BNI-701800-G1-SER	TTMV
MH017554	BNI-701800-G1-CSF	TTMV
MH017553	BNI-701196-G1-CSF	TTMV
MH017552	BNI-700886-G1-CSF	TTMV
MH017551	BNI-700835-G1-SER28	TTMV
MH017550	BNI-700835-G1-SER0	TTMV
MH017549	BNI-700835-G1-CSF(2)	TTMV
MH017548	BNI-700831-G1-CSF*	TTMV
MH017547	BNI-700684-G1-CSF	TTMV
MH017546	BNI-700620-G1-CSF	TTMV
AB038625	TLMV-CLC062	TTMV
EF538882	LIL-y3*	TTMV
EF538881	LIL-y2*	TTMV
EF538880	LIL-y1*	TTMV
KM259874	ALH8*	TTMV
KM259873	ALA22*	TTMV
AF291073	PB4TL*	TTMV
AB038631	TLMV-NLC030*	TTMV
AB041963	Pt-TTV8-II*	TTMV
AB041962	TGP96*	TTMV
AB038630	TLMV-NLC026*	TTMV
AB038629	TLMV-NLC023*	TTMV
AB038627	TLMV-CLC156*	TTMV
AB026931	TLMV-CBD279*	TTMV
AB026929	TLMV-CBD203*	TTMV
KF764702	D50	TTMV
KF764701	D11*	TTMV
KY856742	zhenjiang*	TTMV
AB026930	TLMV-CBD231	TTMV
AB038628	TLMV-CLC205	TTMV
AB038626	TLMV-CLC138	TTMV
KT163888	P9-3*	TTMV
MH017566	BNI-700907-G3-SER0*	TTMV
LC381845	KS025*	TTMV
KT163876	P1-2*	TTMV
KT163914	P18-3	TTMV
KT163898	P13-3*	TTMV
KT163910	P15-8 *	TTMV
KT027936	Cpz1cl2 *	TTMV
KT027938	Cpz2cl2*	TTMV
KT027941	GorMcl4*	TTMV
AB303563	MDJN52	TTMDV
AB449064	Pt-TTMDV225-2	TTMDV
AB449063	Pt-TTMDV225-1	TTMDV
AB303565	MDJN91	TTMDV
AB303557	MDJHem8-2	TTMDV
AB303556	MDJHem8-1	TTMDV
AB303555	MDJHem5*	TTMDV
AB449062	Pt-TTMDV210*	TTMDV
AB303566	MDJN97*	TTMDV
AB303564	MDJN69*	TTMDV
AB303562	MDJN51*	TTMDV
AB303561	MDJN47*	TTMDV
AB303560	MDJN14*	TTMDV
AB303559	MDJN2*	TTMDV
AB303558	MDJN1*	TTMDV
AB303554	MDJHem3-2*	TTMDV
AB303553	MDJHem3-1*	TTMDV
AB303552	MDJHem2*	TTMDV
AB290917	MD1-032	TTMDV
EF538876	6PoSMA*	TTMDV
EF538875	2PoSMA*	TTMDV
AB290918	MD1-073*	TTMDV
AB290919	MD2-013*	TTMDV
KT163882	P6*	TTMDV
AY622909	SAV2	TTMDV
AY622908	SAV1	TTMDV
KT163891	P9-6	TTMDV
