# Supplementary material for: High-Depth Viral Blood Metagenomics Reveals Extensive Anellovirus Diversity in Healthy Humans
Source: Research Square preprint supplement (doi:10.21203/rs.3.rs-115092/v1), 2020-12-04
Supplement: Supplementary file 16 [file 8288fe87f6399eadeb504542.xlsx]

## Sheet: Hoja1
	C00	C01	C02	P01		P02		P03		P04		P05		P06		P07		P08		P09		P10		P11		P12
	centrifuge	centrifuge	centrifuge	centrifuge	recentrifuge	centrifuge	recentrifuge	centrifuge	recentrifuge	centrifuge	recentrifuge	centrifuge	recentrifuge	centrifuge	recentrifuge	centrifuge	recentrifuge	centrifuge	recentrifuge	centrifuge	recentrifuge	centrifuge	recentrifuge	centrifuge	recentrifuge	centrifuge	recentrifuge
# Total reads	1923407	1219848	1978511	835504	183836	1948103	123617	1008317	123390	1909824	131804	2420824	77249	2706682	47957	1771038	336968	1712606	195036	2042540	509882	1541190	155952	2390182	76143	1935479	73048
# eukaryotic reads	511400	341674	117736	56478	2158	370163	17623	197605	10565	468899	15789	421284	30941	506716	18437	382832	21414	366339	15117	501993	22641	437880	20376	740248	37218	497793	22360
# Human reads	108933	7022	11879	1569	10	16358	51	4692	17	9858	23	10548	46	10245	28	21501	30	18027	64	11636	26	22740	29	8684	142	2869	30
# Bacterial reads	114766	92141	236121	10521	3517	71069	16815	53955	5446	97127	7838	160281	35525	115824	23741	91951	8157	95479	8758	118152	8927	102393	16412	176473	16053	92920	9804
# Viral reads	5663	23872	1825	183088	178024	133180	89124	119250	107307	139719	107968	35297	10691	8849	5687	315049	307294	189222	170888	485850	477528	143863	119050	42951	22604	65039	40742
PhiX	0	0	0	35543	35543	212	211	0	0	0	0	0	0	0	0	0	0	0	0	0	0	23	23	0	0	0	0
MS2	0	0	0	0	0	73	73	0	0	0	0	0	0	0	0	0	0	0	0	0	0	0	0	0	0	0	0
VSV	0	0	0	0	0	4466	4466	0	0	0	0	0	0	0	0	0	0	0	0	0	0	0	0	0	0	0	0
Vaccinia	0	0	0	2121	2121	0	0	0	0	0	0	0	0	0	0	0	0	0	0	0	0	0	0	0	0	0	0
Anelloviridae	0	17	0	139733	139733	115056	82249	106777	106777	127343	107249	15765	9512	7374	5641	304349	304349	168675	168675	461043	461043	137047	117288	26571	22376	55498	40339
Herelleviridae	0	7	0	8	0	0	0	0	0	0	0	31	31	0	0	20	20	0	0	0	0	0	0	7	6	202	200
Myoviridae	10	6	179	0	0	60	51	12	0	9	0	105	89	8	0	25	16	71	55	11	0	500	447	23	0	16	6
Siphoviridae	0	7	65	0	0	17	0	16	14	7	0	58	55	13	13	6	0	0	0	6	0	0	0	7	0	6	0
Environmental samples	2431	775	985	1102	557	5731	2013	1111	134	2166	693	1181	0	1235	0	4822	2863	1990	1140	1323	39	2761	1196	1707	76	1711	7
Herpesviridae	7	0	0	0	0	0	0	6	0	0	0	0	0	6	0	0	0	0	0	6	0	0	0	0	0	17	17
Retroviridae	15	0	117	0	0	116	0	0	0	10	8	0	0	0	0	6	0	22	16	102	0	34	0	0	0	0	0
Arteriviridae	0	7	0	0	0	0	0	0	0	0	0	0	0	0	0	0	0	0	0	0	0	0	0	0	0	0	0
Iflaviridae	0	0	8	0	0	0	0	0	0	0	0	0	0	0	0	0	0	0	0	6	0	0	0	11	0	0	0
Flaviviridae	0	0	0	0	0	0	0	0	0	0	0	0	0	0	0	0	0	0	0	16322	16322	0	0	9	9	0	0
Narnaviridae	0	0	0	0	0	0	0	0	0	0	0	0	0	0	0	0	0	9	9	0	0	0	0	0	0	0	0
Orthomyxoviridae	0	0	6	0	0	0	0	0	0	0	0	0	0	0	0	0	0	0	0	0	0	0	0	8	8	0	0
Paramyxoviridae	0	0	0	0	0	0	0	0	0	10	10	17	17	21	21	0	0	13	13	14	14	8	8	0	0	7	7
Peribunyaviridae	0	0	8	0	0	0	0	0	0	0	0	0	0	0	0	0	0	0	0	0	0	0	0	0	0	0	0
Picornaviridae	0	0	0	0	0	0	0	0	0	0	0	0	0	6	6	10	10	8	0	8	0	0	0	0	0	0	0
Pneumoviridae	0	0	7	0	0	0	0	8	0	0	0	0	0	0	0	0	0	0	0	0	0	0	0	0	0	0	0
Polycipiviridae	0	0	0	0	0	0	0	0	0	0	0	0	0	0	0	0	0	0	0	0	0	0	0	40	40	0	0
Potyviridae	0	6	0	0	0	0	0	0	0	0	0	0	0	0	0	0	0	0	0	78	77	0	0	0	0	0	0
Reoviridae	11	58	0	0	0	70	0	7	0	36	0	66	0	0	0	61	0	17	6	35	0	25	0	72	0	0	0
Tombusviridae	0	0	0	0	0	0	0	0	0	0	0	0	0	0	0	0	0	0	0	0	0	0	0	8	8	0	0
Tospoviridae	0	0	0	0	0	0	0	0	0	0	0	0	0	0	0	0	0	0	0	0	0	0	0	0	0	6	6
Adenoviridae	0	6	0	0	0	0	0	0	0	0	0	0	0	0	0	0	0	0	0	0	0	0	0	0	0	0	0
Baculoviridae	91	0	0	0	0	0	0	365	365	0	0	0	0	0	0	0	0	0	0	0	0	69	69	0	0	102	101
Bicaudaviridae	0	0	0	51	51	0	0	0	0	0	0	0	0	0	0	0	0	0	0	0	0	0	0	0	0	0	0
Circoviridae	692	502	0	0	0	92	0	249	0	0	0	467	0	0	0	36	0	319	0	44	0	99	0	3500	0	3423	0
Genomoviridae	0	0	0	0	0	45	45	0	0	0	0	0	0	0	0	0	0	0	0	0	0	0	0	0	0	0	0
Hytrosaviridae	0	0	0	0	0	0	0	0	0	0	0	0	0	0	0	0	0	0	0	0	0	10	10	0	0	0	0
Iridoviridae	0	0	0	0	0	0	0	0	0	0	0	0	0	0	0	0	0	0	0	19	19	0	0	20	20	7	7
Microviridae (no PhiX)	8	0	18	0	0	0	0	19	17	16	0	0	0	0	0	0	0	11932	946	0	0	0	0	15	0	2311	0
Mimiviridae	0	50	78	0	0	25	16	8	0	11	0	929	921	26	0	13	9	18	0	32	14	0	0	9	0	0	0
Papillomaviridae	0	0	0	0	0	0	0	0	0	0	0	0	0	0	0	13	13	0	0	0	0	0	0	45	45	0	0
Parvoviridae	0	0	0	6	6	0	0	0	0	0	0	0	0	0	0	0	0	0	0	0	0	9	9	0	0	0	0
Phycodnaviridae	0	0	0	13	13	0	0	0	0	8	8	0	0	0	0	0	0	0	0	0	0	0	0	0	0	0	0
Polydnaviridae	6	0	0	0	0	0	0	0	0	0	0	23	23	0	0	0	0	0	0	0	0	0	0	0	0	0	0
Poxviridae (no vaccinia)	0	11	17	0	0	0	0	0	0	0	0	33	32	7	0	0	0	33	28	0	0	0	0	12	10	31	24
CRESS viruses	2329	21930	13	0	0	5640	0	10311	0	8371	0	15869	0	0	0	2680	0	4924	0	5267	0	860	0	5713	0	801	0
Circovirus-like virus	0	0	10	0	0	0	0	0	0	88	0	42	0	0	0	0	0	0	0	0	0	113	0	26	0	0	0
Pithoviridae	0	0	9	0	0	0	0	0	0	0	0	0	0	0	0	7	0	0	0	0	0	0	0	0	0	0	0
Others	28	461	204	651	0	48	0	55	0	118	0	108	11	104	6	303	14	312	0	499	0	8	0	5078	6	223	28
